# Supplementary material
Source: PubMed Central journal article supplement (PMC11071055)
Supplement: NIHMS1613486-supplement-Supp1.pdf [file NIHMS1613486-supplement-Supp1.pdf]

## Supporting Information for

### Opposite Thermal Expansion in Isostructural Non-collinear Antiferromagnetic Compounds of $Mn_3A$ (A = Ge and Sn)

Yuzhu Song<sup>†,‡</sup>, Yongqiang Qiao<sup>‡</sup>, Qingzhen Huang<sup>§</sup>, Chinwei Wang<sup>†</sup>, Xinzhi Liu<sup>†</sup>,  
Qiang Li<sup>‡</sup>, Jun Chen<sup>†,‡,\*</sup> and Xianran Xing<sup>†,‡</sup>

<sup>†</sup> Beijing Advanced Innovation Center for Materials Genome Engineering, University of Science and Technology Beijing, Beijing 100083, China

<sup>‡</sup> Department of Physical Chemistry, University of Science and Technology Beijing, Beijing 100083, China

<sup>§</sup> NIST Center for Neutron Research, National Institute of Standards and Technology, Gaithersburg MD, 20899-6102, USA

<sup>†</sup> Neutron Group, National Synchrotron Radiation Research Center, Hsinchu 30077, Taiwan

<sup>†</sup> Helmholtz-Zentrum-Berlin für Materialien und Energie, Hahn-Meitner-Platz 1, D-14109 Berlin, Germany

\*Corresponding author: [junchen@ustb.edu.cn](mailto:junchen@ustb.edu.cn)

1. **Sample preparation:** The samples of polycrystalline of  $\text{Mn}_3\text{Ge}$  were prepared using precursor elements with better than 99.9% purity via arc melting under a high-purity argon atmosphere. To ensure homogeneity, the button samples were turned over and melted many times. After melting, the samples were wrapped with Mo foils, then annealed in a vacuum-sealed quartz tube at 1073 K for 6 days and subsequently quenched in water.
2. **Experiment methods:** The linear thermal expansion ( $\Delta l/l_0$ ) was measured using a thermodilatometer (DIL 402 Expedis Select). Temperature dependence of high-intensity NPD data with  $\lambda = 2.41 \text{ \AA}$  were collected at the high-intensity diffractometer Wombat of the Australian Nuclear Science and Technology Organisation (ANSTO). Temperature dependence of the usual NPD data was collected using the BT-1 neutron powder diffractometer at the NIST Center for Neutron Research. The wavelength of the neutron beam was  $1.5397 \text{ \AA}$ . The high-intensity synchrotron X-ray diffraction patterns of  $\text{Mn}_3(\text{Ge}_{1-x}\text{Sn}_x)$  at room temperature were collected at the beamline 11-ID-C of APS, Argonne National Laboratory with high-energy X-ray radiation ( $\lambda = 0.1173 \text{ \AA}$ ). The magnetism properties were measured using the Quantum Design physical property measurement system (PPMS) with the vibrating sample magnetometer (VSM). The mechanical properties of  $\text{Mn}_3\text{Ge}$  ingots with a diameter of 2 mm and a length of 5 mm were obtained using a mechanical testing machine (Instron-5966) at room temperature. The electrical conductivity and thermal conductivity properties were measured using a standard four-probe method and a steady-state method,

respectively. The structural refinements for all NPD data were analysed using the FULLPROF software.

### 3. Supplementary Figures

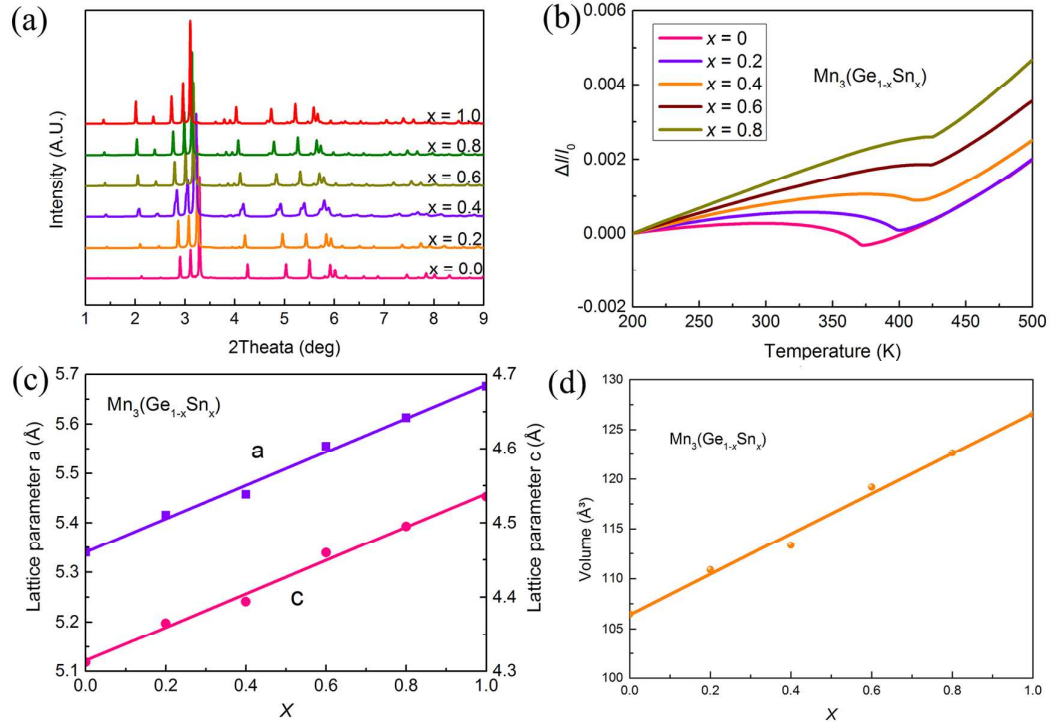

**Figure S1.** Crystal structure and thermal expansion property of  $\text{Mn}_3(\text{Ge}_{1-x}\text{Sn}_x)$  ( $x = 0, 0.2, 0.4, 0.6, 0.8, 1.0$ ). (a) High-intensity SXRD patterns of  $\text{Mn}_3(\text{Ge}_{1-x}\text{Sn}_x)$  at room temperature. (b) Linear thermal expansion property of  $\text{Mn}_3(\text{Ge}_{1-x}\text{Sn}_x)$  determined by a dilatometer. (c) Lattice parameters  $a$  and  $c$  of  $\text{Mn}_3(\text{Ge}_{1-x}\text{Sn}_x)$  as function of  $x$ . (d) Unit cell volume of  $\text{Mn}_3(\text{Ge}_{1-x}\text{Sn}_x)$  as function of  $x$ .

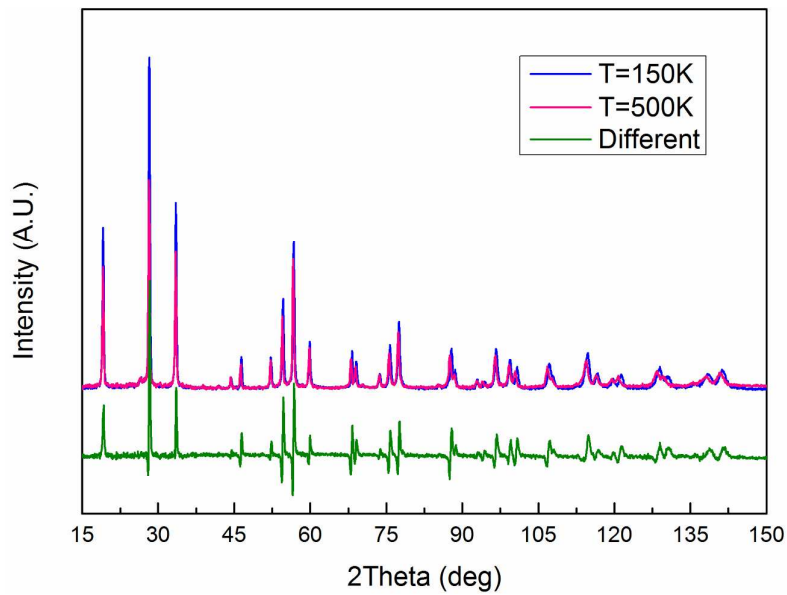

**Figure S2.** The NPD patterns of  $\text{Mn}_3\text{Ge}$  at different temperature ( $T = 150 \text{ K}$  and  $T = 500 \text{ K}$ ). The difference at the bottom represents the contribution of the magnetic structure to the diffraction peaks.

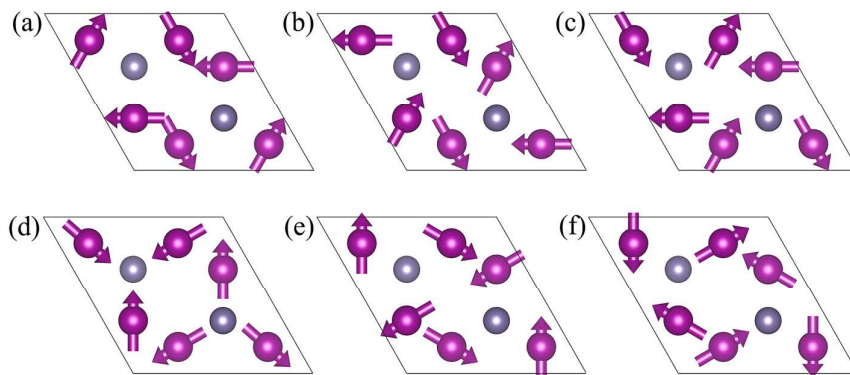

**Figure S3.** Triangular antiferromagnetic structural models. The possible triangular antiferromagnetic structural models allowed by the symmetry of  $P6_3/mmc$  structure and its subgroups.

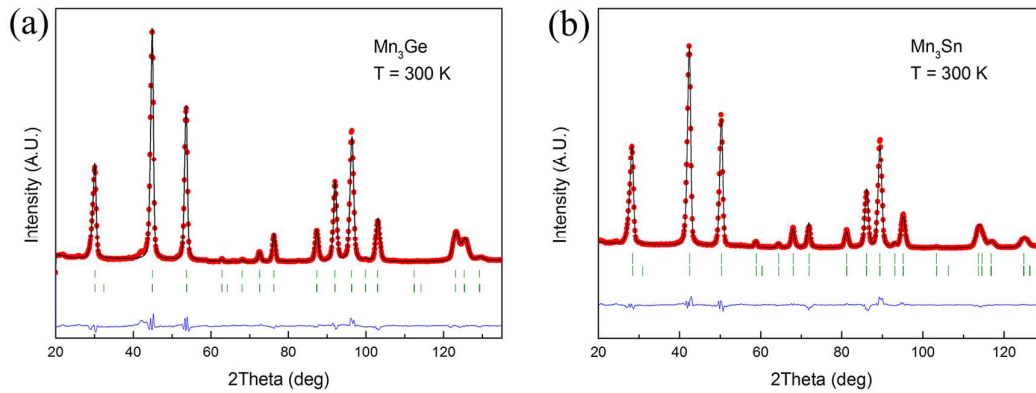

**Figure S4.** Structure refinements of high-intensity NPD patterns of (a)  $\text{Mn}_3\text{Ge}$ , and (b)  $\text{Mn}_3\text{Sn}$  at  $T = 300$  K. The propagation vector of magnetic structure is  $\mathbf{k} = (0, 0, 0)$ , since no additional peaks and only the additional contribution to the nuclear peaks can be observed.

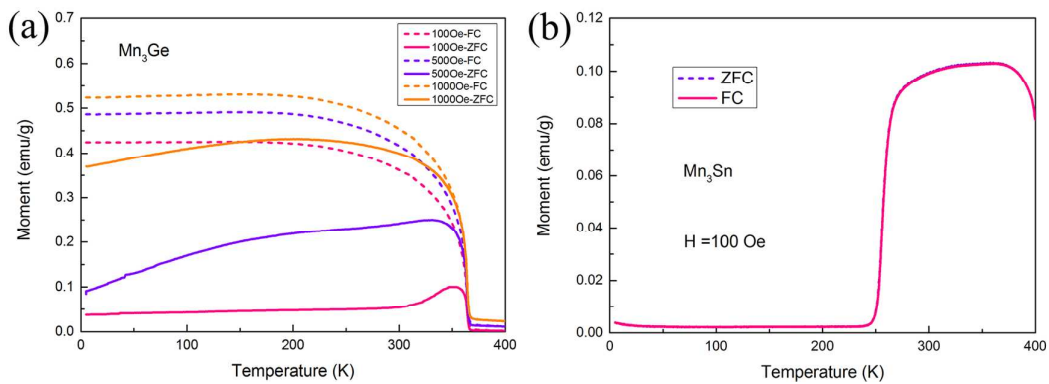

**Figure S5.** Macroscopic magnetic behavior of  $\text{Mn}_3\text{Ge}$  and  $\text{Mn}_3\text{Sn}$ . Temperature dependences of zero-field-cooling (ZFC) and field-cooling (FC) magnetization under different magnetic fields for the (a) NTE  $\text{Mn}_3\text{Ge}$  and (b) PTE  $\text{Mn}_3\text{Sn}$ .

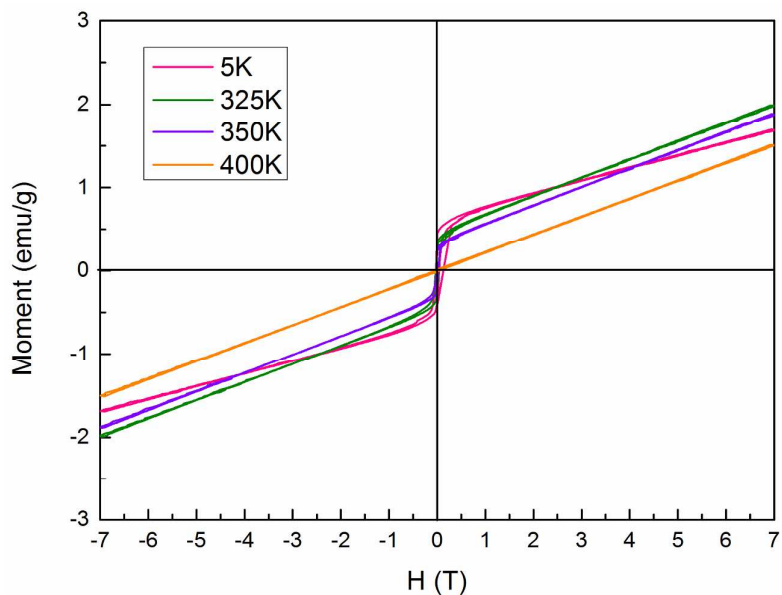

**Figure S6.**  $M$ - $H$  curves for  $\text{Mn}_3\text{Ge}$ . Isothermal magnetization curves measured at  $T = 5, 325, 350, 400$  K.

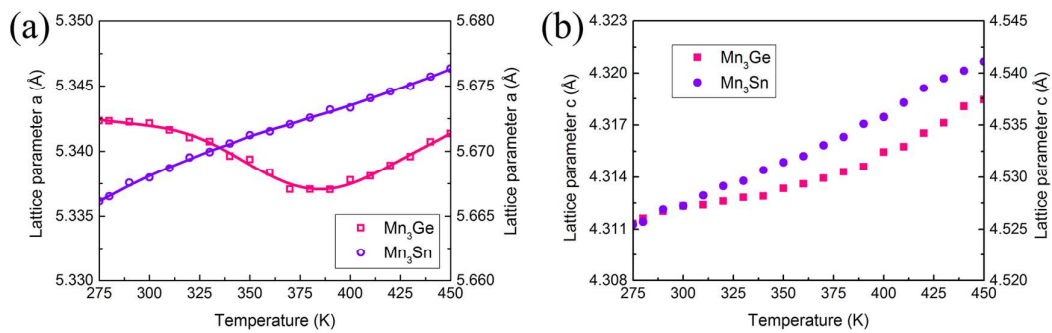

**Figure S7.** Temperature dependence of lattice parameters (a)  $a$  and (b)  $c$  for  $\text{Mn}_3\text{Ge}$  and  $\text{Mn}_3\text{Sn}$ .

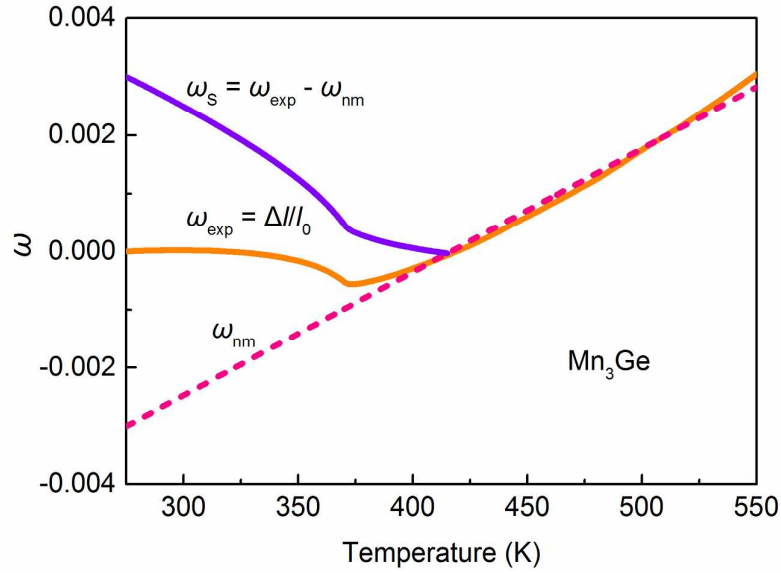

**Figure S8.** Thermal expansion properties of  $\text{Mn}_3\text{Ge}$ .  $\omega_{\text{exp}}$  is experimental linear thermal expansion data measured by thermo-dilatometer,  $\omega_{\text{nm}}$  is the nominal thermal expansion contributed from the nonmagnetic state, which is calculated according to the Debye-Grüneisen relationship, and  $\omega_s$  ( $\omega_s = \omega_{\text{exp}} - \omega_{\text{nm}}$ ) is the contribution of spontaneous volume magnetostriction from magnetic ordering.

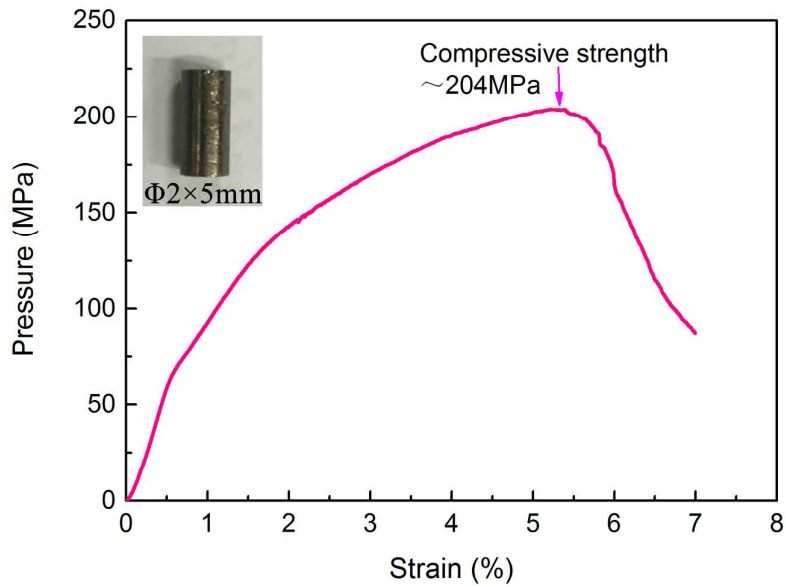

**Figure S9.** Mechanical properties of the NTE  $\text{Mn}_3\text{Ge}$  sample. The engineering stress–strain curve of the  $\text{Mn}_3\text{Ge}$  ingots at room temperature.

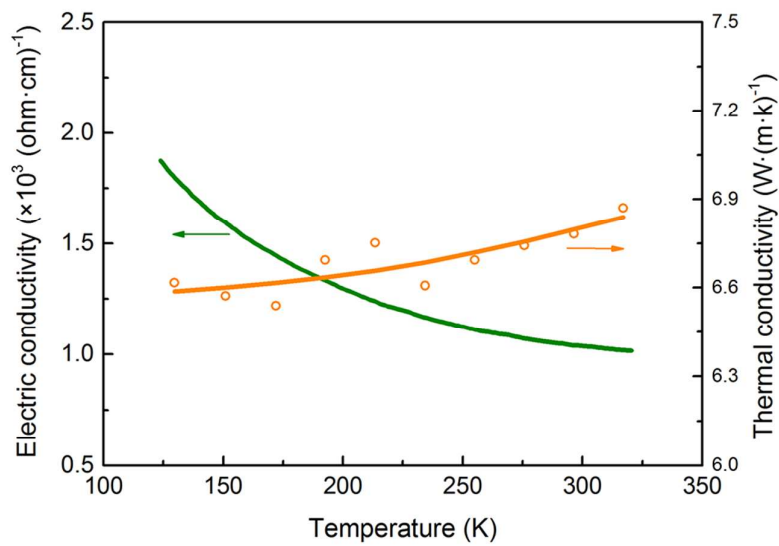

**Figure S10.** Temperature dependence of the electrical and thermal conductivity properties.
